# Supplementary material for: β-Lactam-host defence peptide conjugates as antibiotic prodrug candidates targeting resistant bacteria
Source: Royal Society of Chemistry journal article supplement (doi:10.1039/c2ra01351g), 2012-01-01
Supplement: c2ra01351g.pdf [file c2ra01351g.pdf]

## $\beta$ -Lactam-host defence peptide conjugates as antibiotic prodrug candidates targeting resistant bacteria

Stéphane Desgranges, Carol C. Ruddle, Liam P. Burke, Tara M. Mc Fadden, John E. O'Brien, Deirdre Fitzgerald -Hughes, Hilary Humphreys, Timothy P. Smyth and Marc Devocelle\*

Centre for Synthesis and Chemical Biology, Department of Pharmaceutical & Medicinal Chemistry, Royal College of Surgeons in Ireland, 123, St. Stephen's Green, Dublin 2, Ireland. E-mail: [mdevocelle@rcsi.ie](mailto:mdevocelle@rcsi.ie)

### Supporting Information.

#### 1. cephalothin-D-Bac8c(Leu<sup>2,5</sup>) (8)

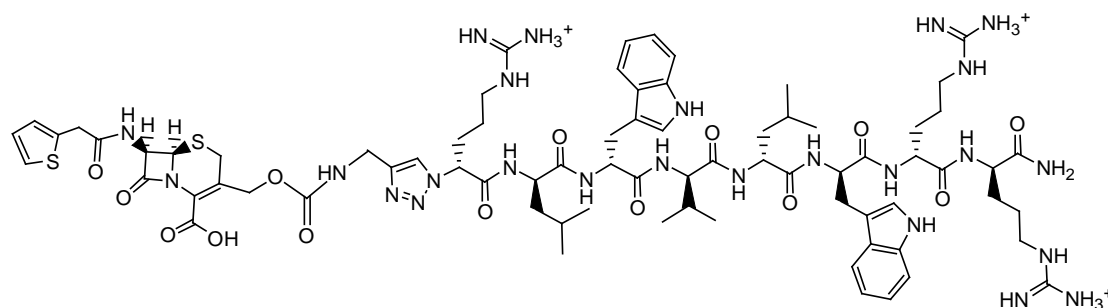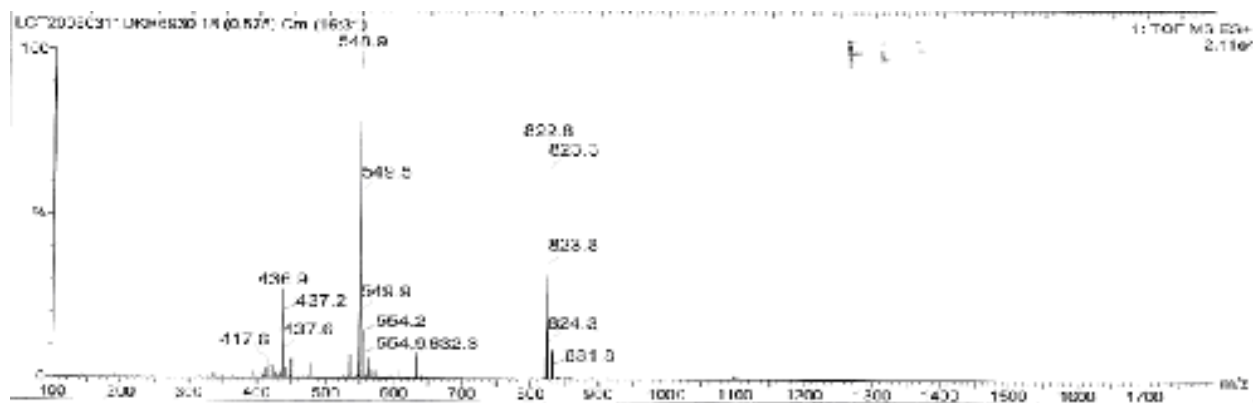

**Figure S1.** EI-MS recorded at 35eV.

The signal at  $m/z = 822.8$  corresponds to a doubly charged ion, *i.e.*  $[M + 2H]^{2+}$ ; the signal at  $m/z = 548.9$  corresponds to a triply charged ion, *i.e.*  $[M + 4H]^{4+}$ ; the signal at  $m/z = 436.8$  is unidentified.

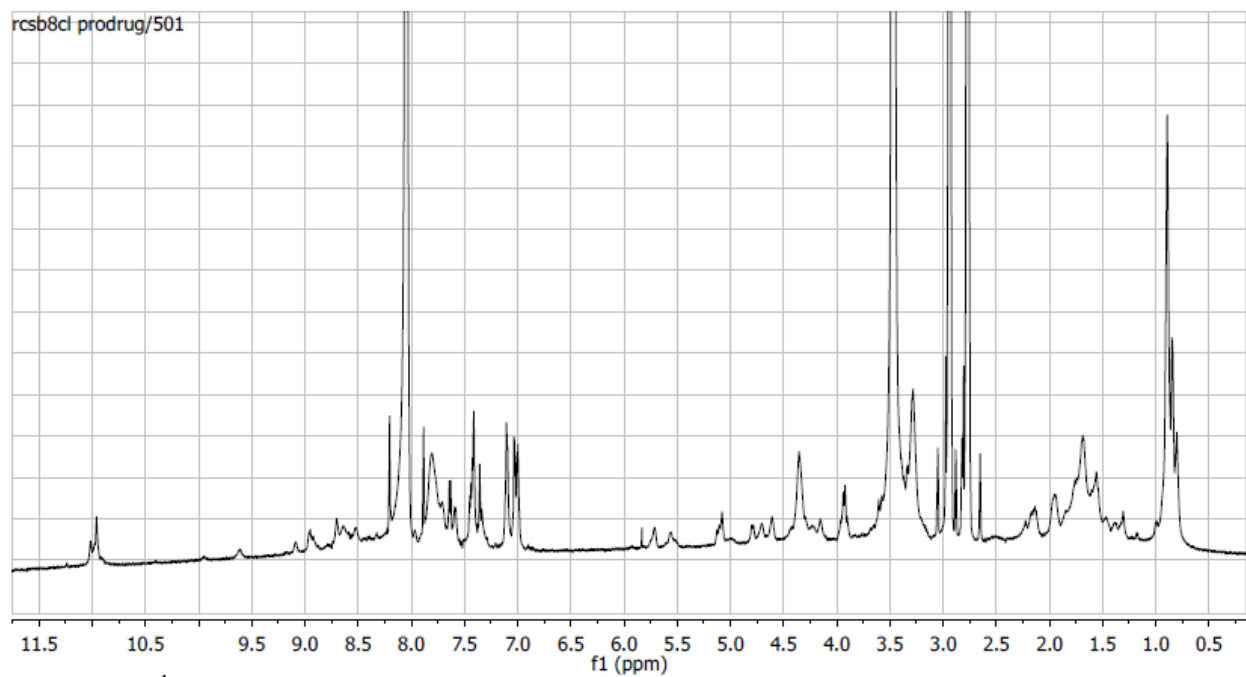

Figure S2.  $^1\text{H}$  NMR (5%  $\text{D}_2\text{O}$ , 95%  $\text{H}_2\text{O}$ ).

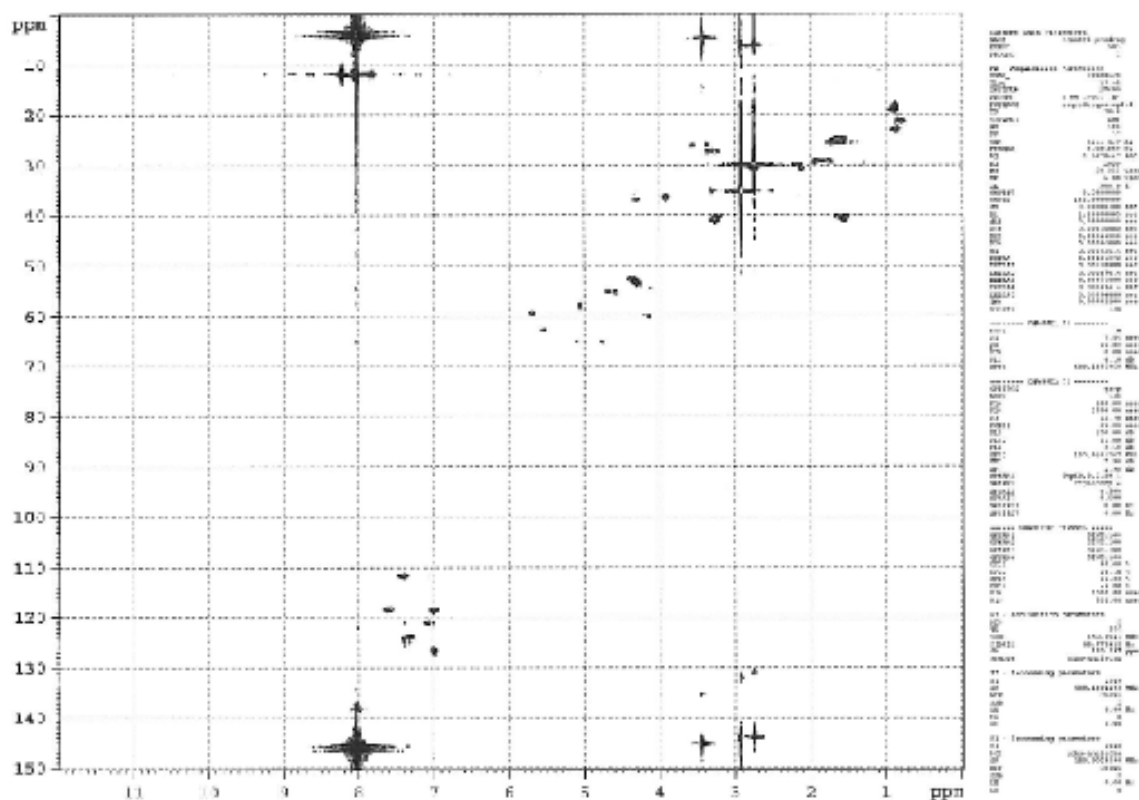

Figure S3a. C-H correlation NMR.

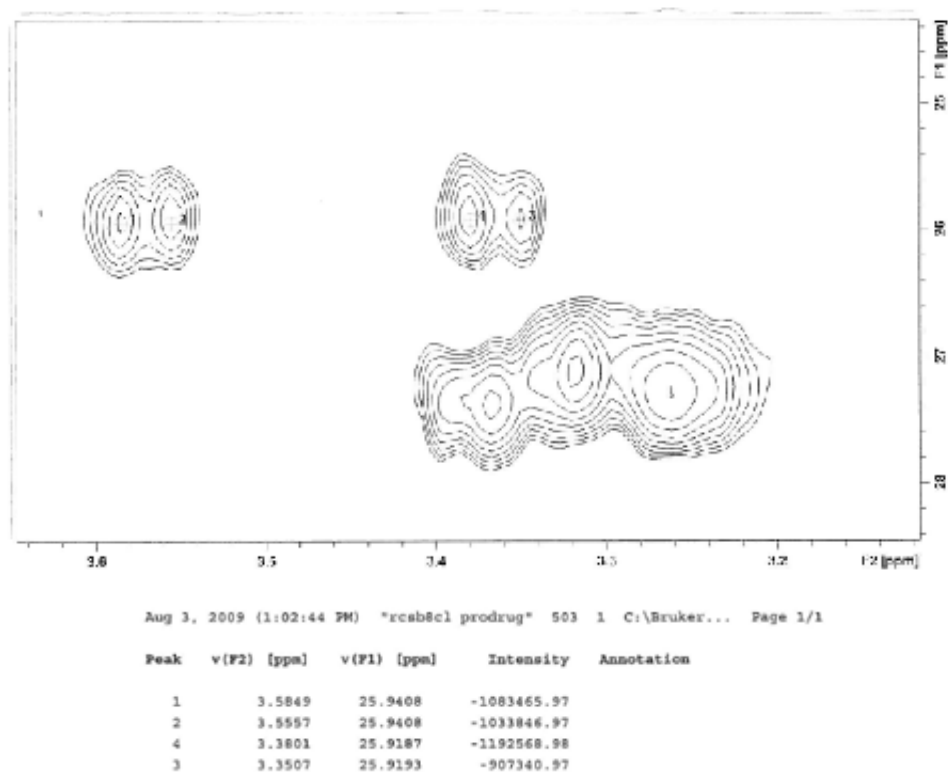

**Figure S3b.** Enlargement of the C-H correlation spectrum and  $H^2$  constant coupling table.

## 2. Activation assays

Chemical and enzymatic hydrolyses of cephalothin-D-Bac8c(Leu<sup>2,5</sup>) (**8**): these assays were performed at pH 7.25 in a 10 mM PBS buffer, by monitoring with a UV-spectrophotometer the disappearance of the cephalothin's  $\beta$ -lactam bond at 260 nm. The chemical hydrolysis assay was carried out in a 0.41 M NaOH solution using a 0.21 mM solution of cephalothin (Fig. S4) or a 0.140 mM solution of (**8**) (Fig. S5).  $\beta$ -Lactamase-mediated reactivation assays were performed with a purified P99 enzyme from *Enterobacter cloacae* (0.8 mg, 0.32  $\mu$ M) using a 9.9 mM solution of cephalothin (Fig. S6) or a 13 mM solution of (**8**) (Fig. S7).

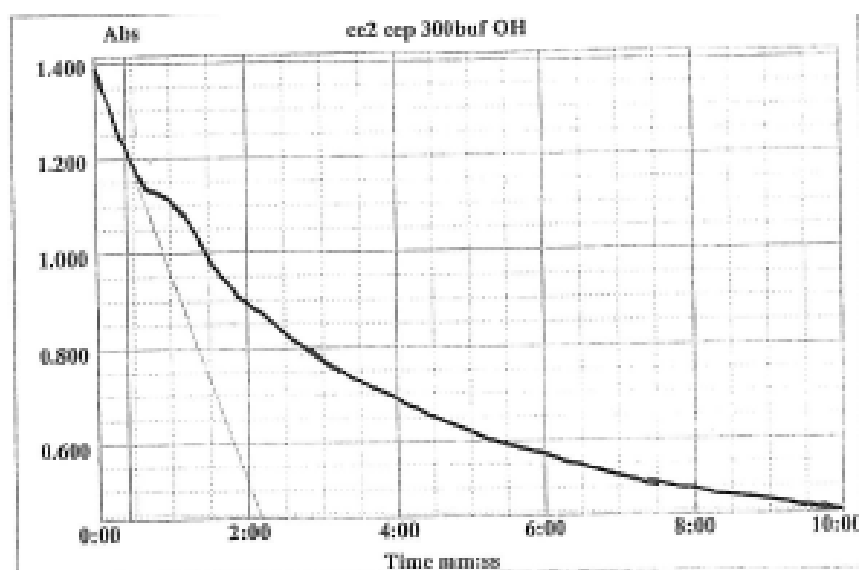

**Figure S4.** UV spectra for the alkaline hydrolysis of cephalothin (the linear graph is the kinetic derivative).

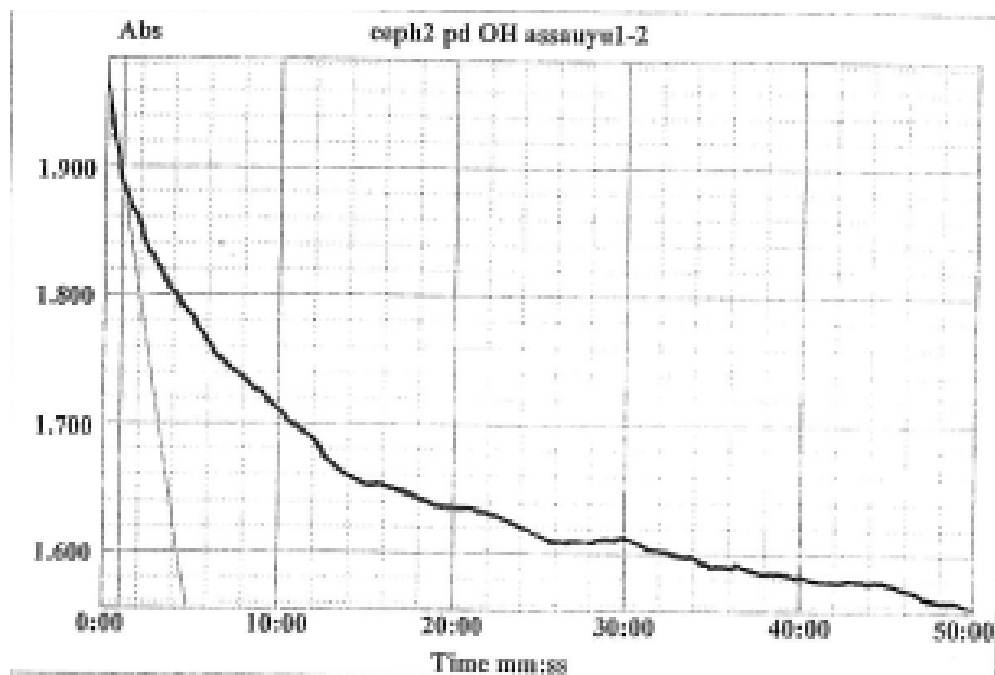

**Figure S5.** UV spectra for the alkaline hydrolysis of (8).

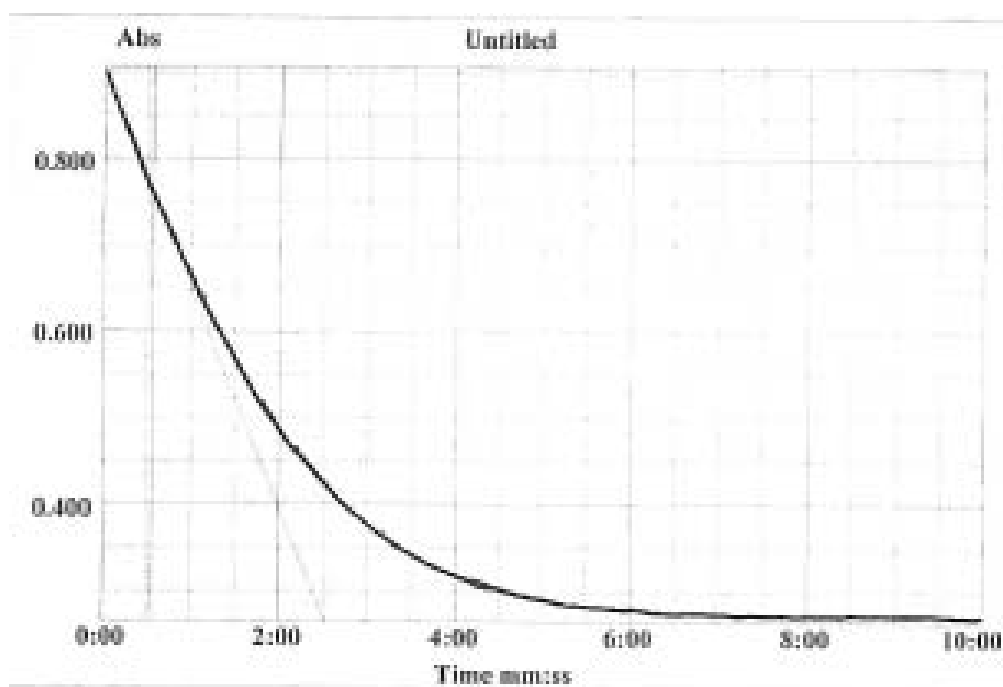

**Figure S6.** UV spectra for the enzymatic hydrolysis of cephalothin.

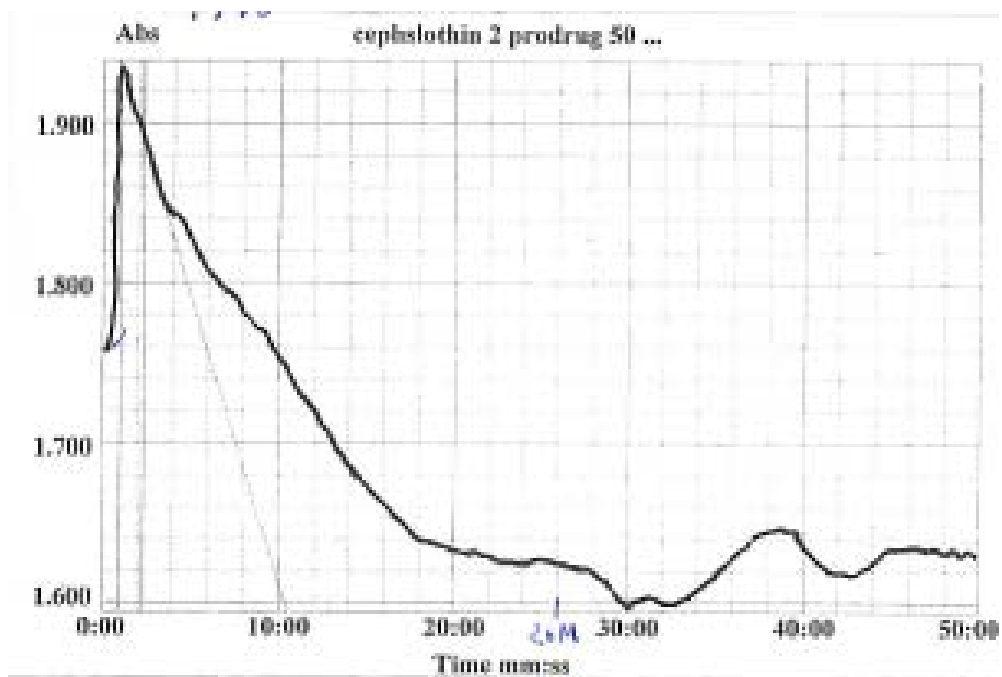

**Figure S7.** UV spectra for the enzymatic hydrolysis of (8).

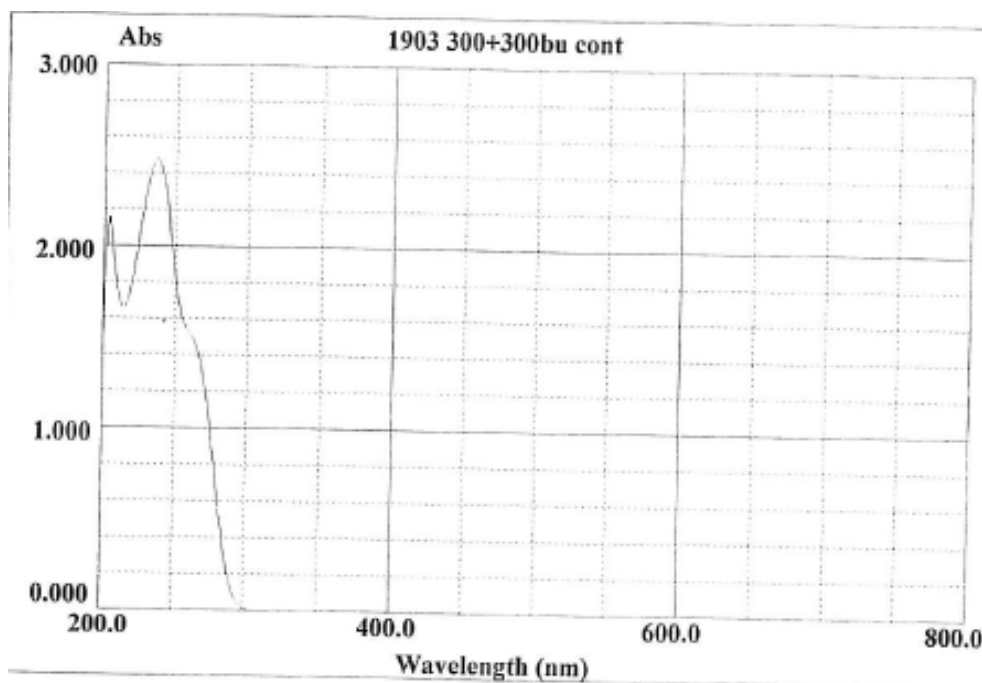

**Figure S8.** UV wave scans of cephalothin (0.1 mM), before hydrolysis.

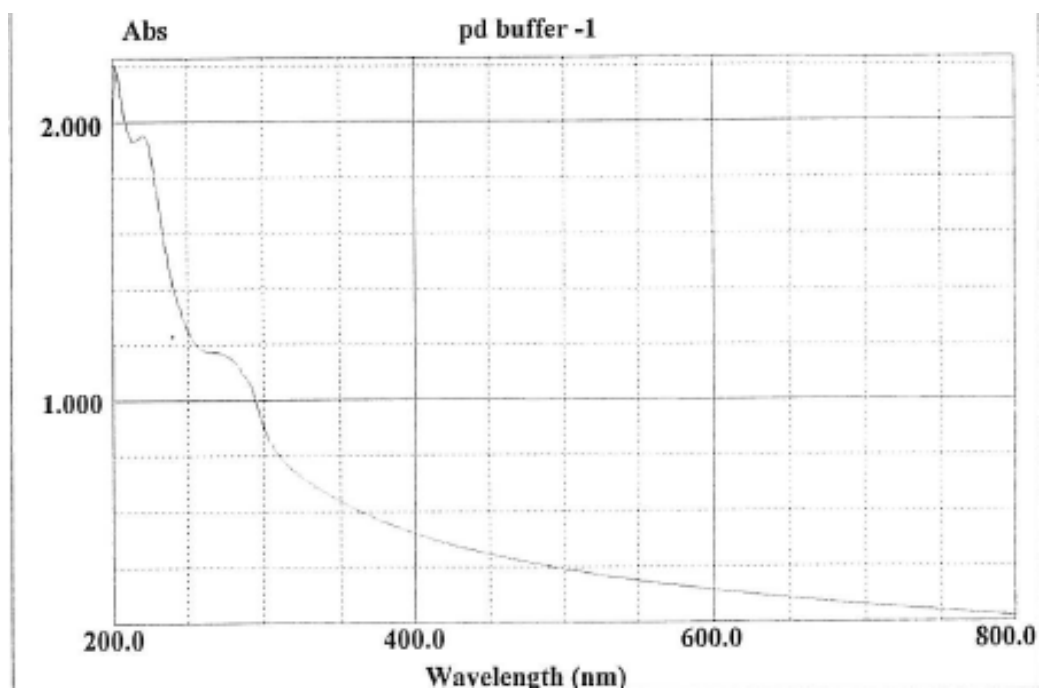

**Figure S9.** UV wave scans of **(8)** (0.070 mM), before hydrolysis.

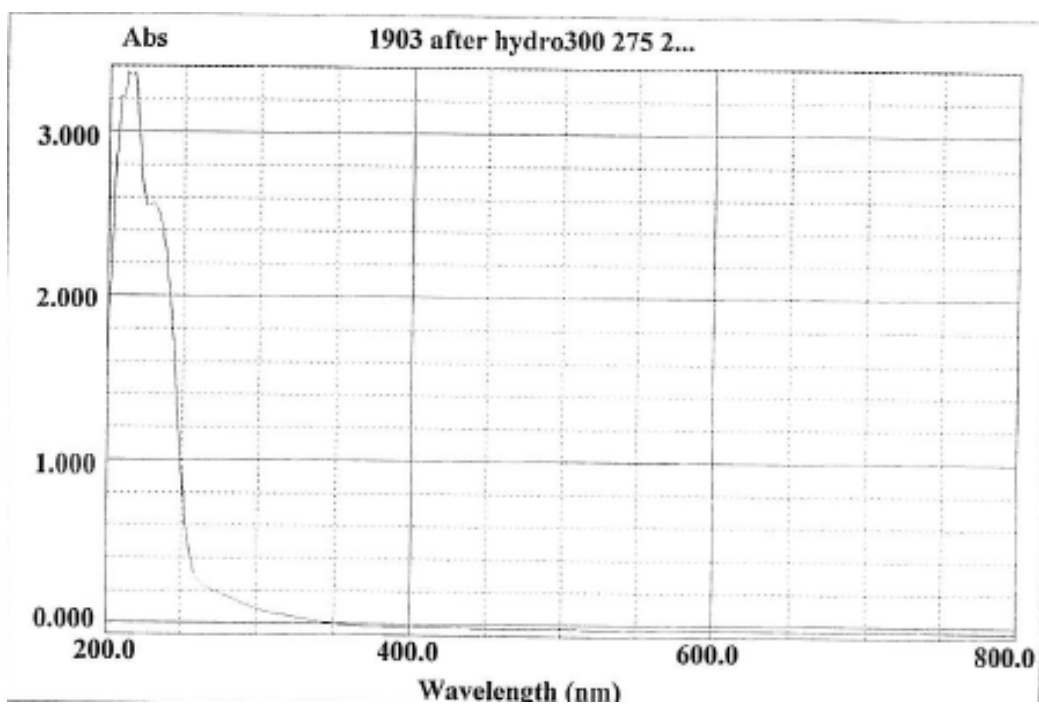

**Figure S10.** UV wave scans of cephalothin (0.1 mM) after chemical hydrolysis.

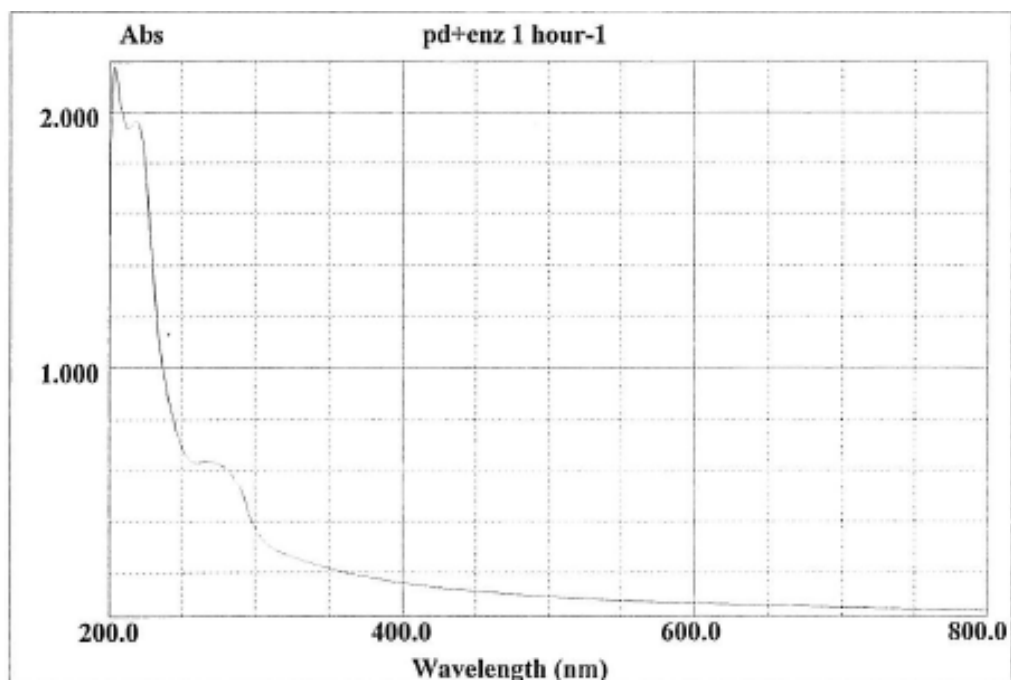

**Figure S11.** UV wave scans of **(8)** (0.07 mM) after chemical hydrolysis.

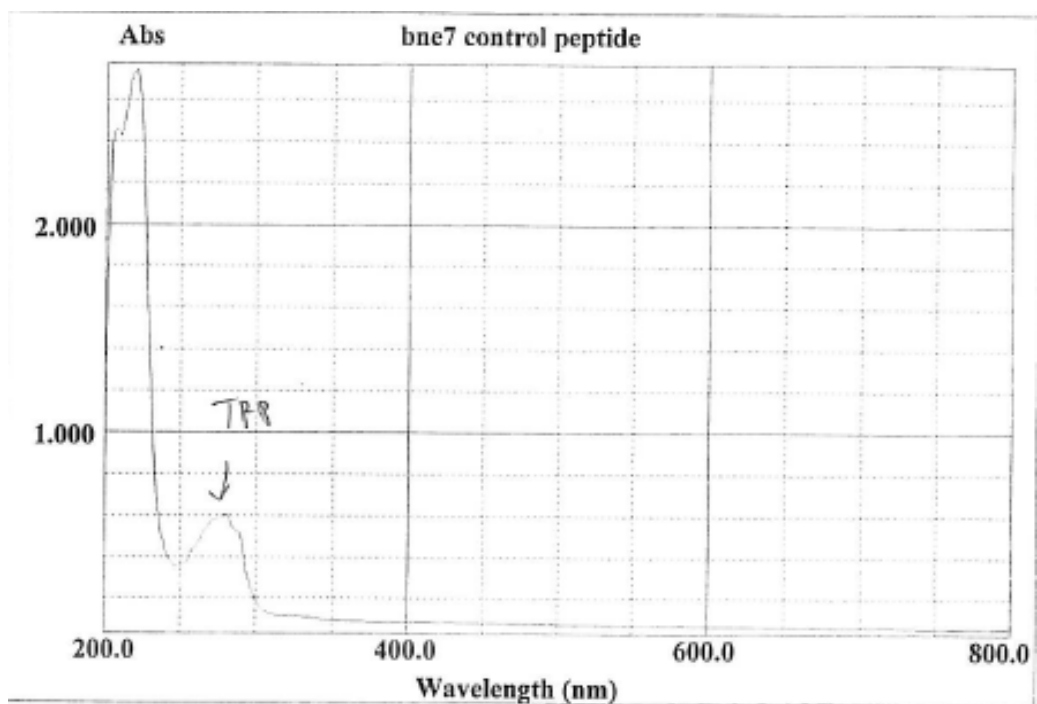

**Figure S12.** UV wave scans of the triazole peptide **(9)** (0.075 mM).

### 3. Spectra and chromatograms

#### (6*R*, 7*R*)-7-Amino-3-hydroxymethyl-3-cephem-4-carboxylic acid (7-AHCA, 3)

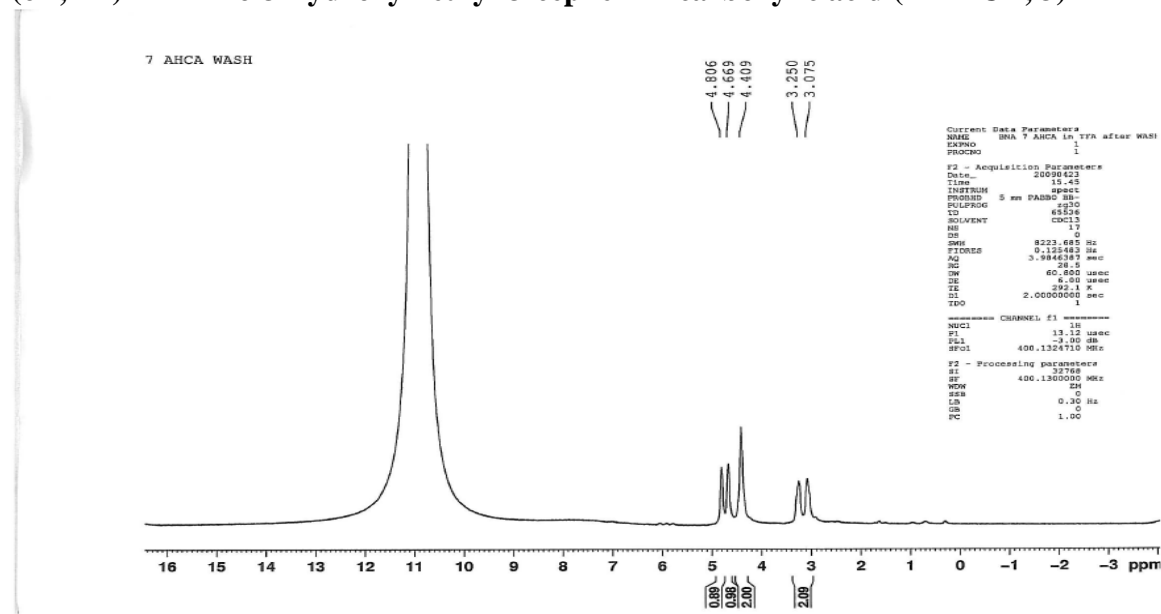

<sup>1</sup>H NMR (400 MHz, TFA)

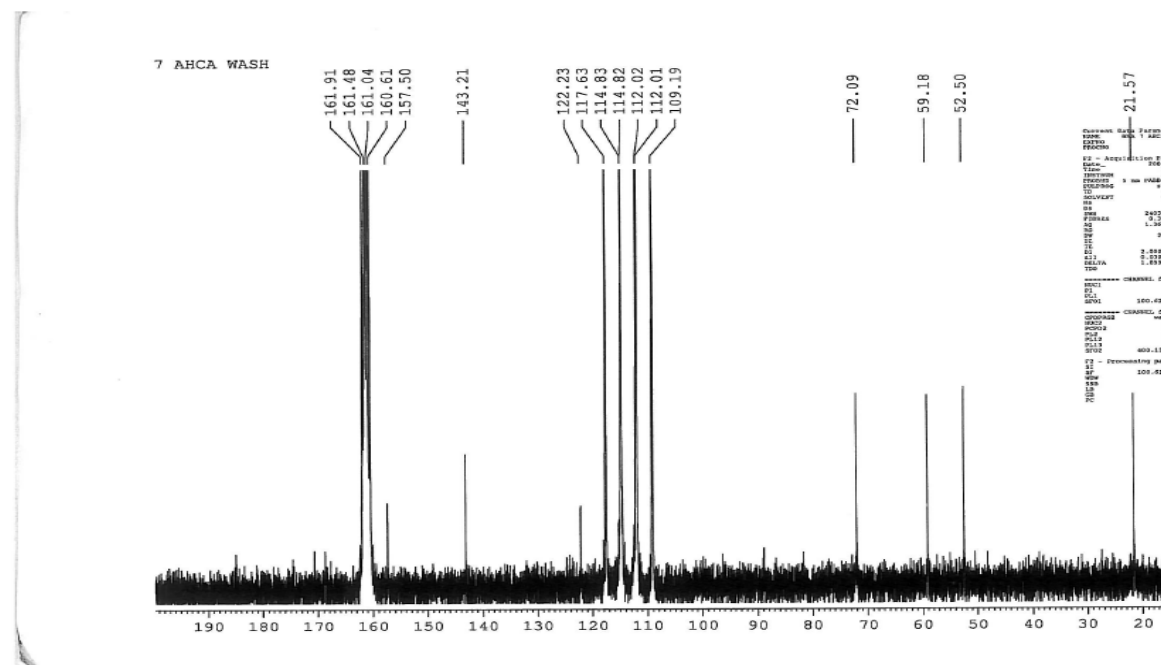

<sup>13</sup>C NMR (100.6 MHz, TFA)



(6*R*, 7*R*)-3-Hydroxymethyl-7-(2-thiophen-2-yl-acetylamino) 3-cephem-4-carboxylic acid benzhydryl ester (4)

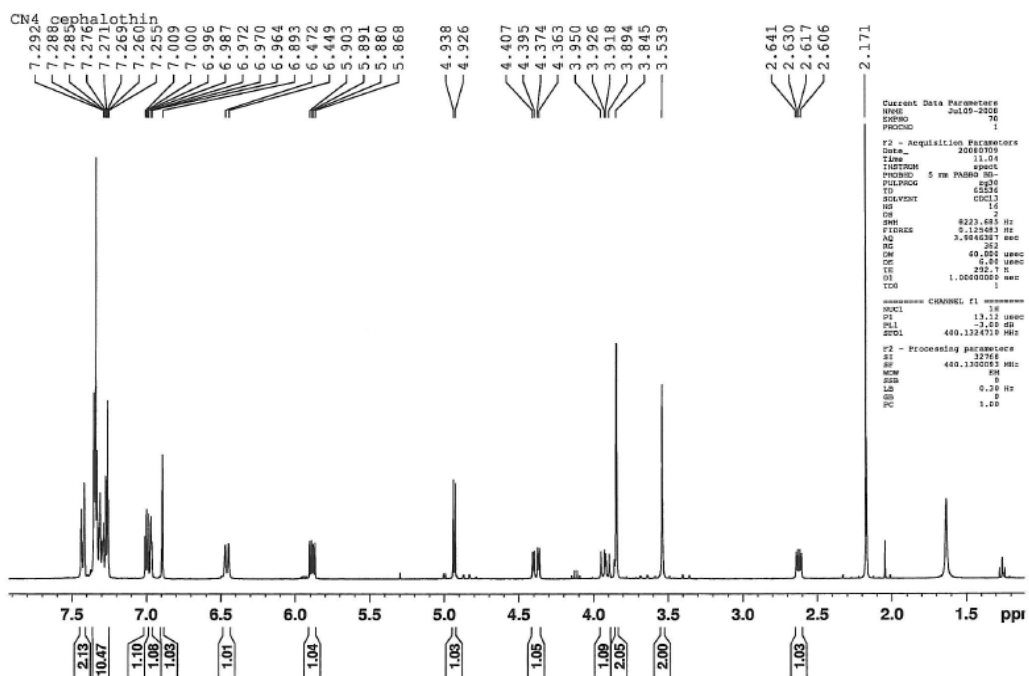

<sup>1</sup>H NMR (400 MHz, CDCl<sub>3</sub>)

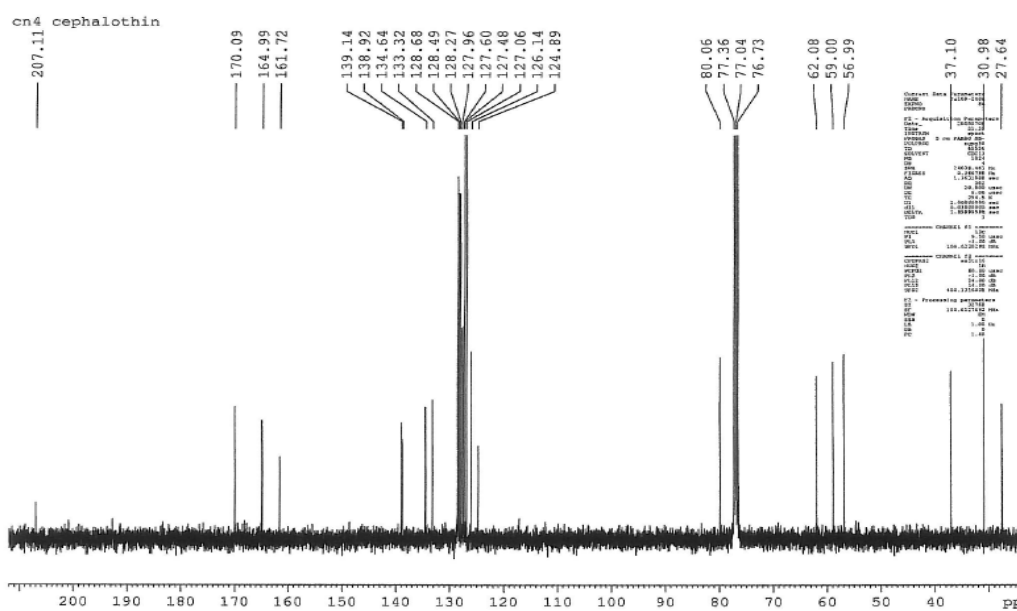

<sup>13</sup>C NMR (100.6 MHz, CDCl<sub>3</sub>)

**(6*R*, 7*R*)-3-(*p*-nitrophenoxycarbonyloxymethyl)-7-(2-thiophen-2-yl-acetylamino) 3-cephem-4-carboxylic acid benzhydryl ester (5a)**

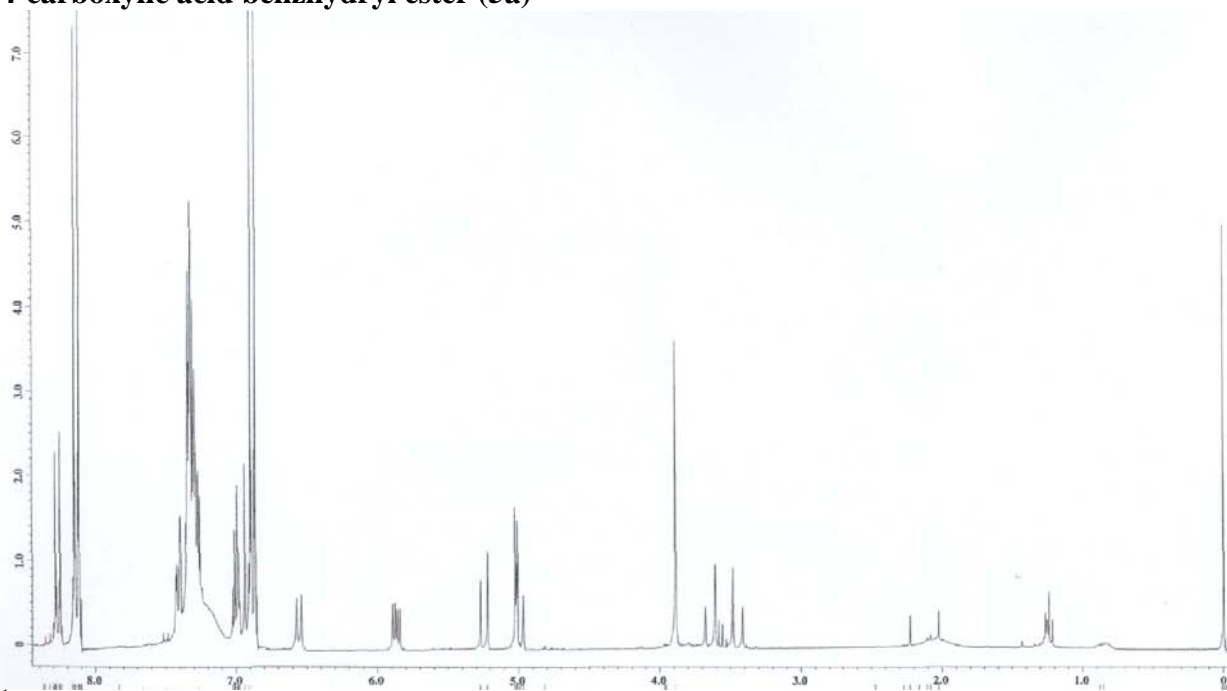

<sup>1</sup>H NMR (4270 MHz, CDCl<sub>3</sub>)

**(6*R*, 7*R*)-3-(1,2,2,2-Tetrachloro-ethoxycarbonyloxymethyl)-7-(2-thiophen-2-yl-acetylamino)  
3-cephem-4-carboxylic acid benzhydryl ester (5b)**

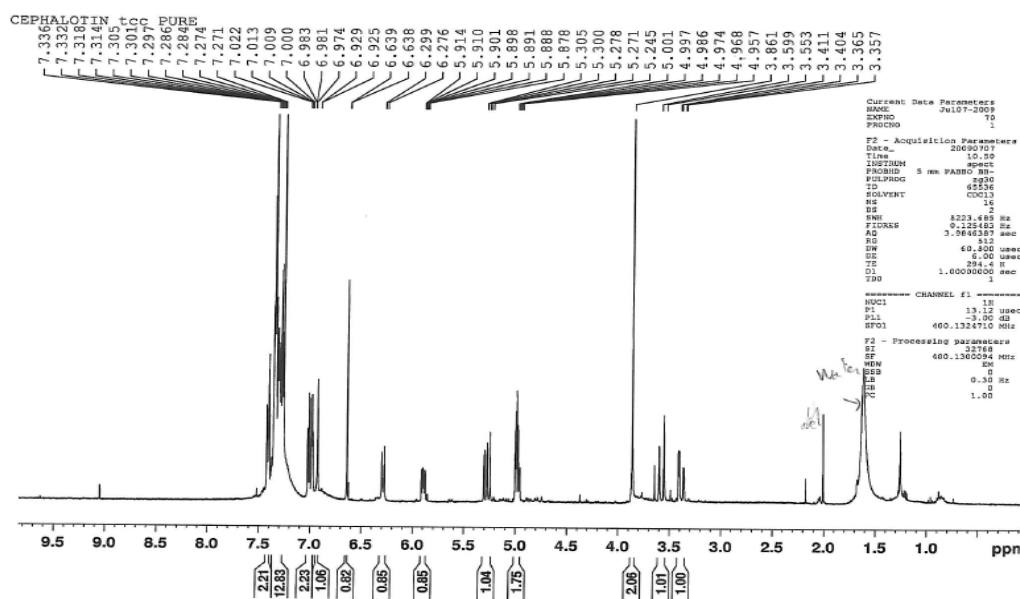

<sup>1</sup>H NMR (400 MHz, CDCl<sub>3</sub>)

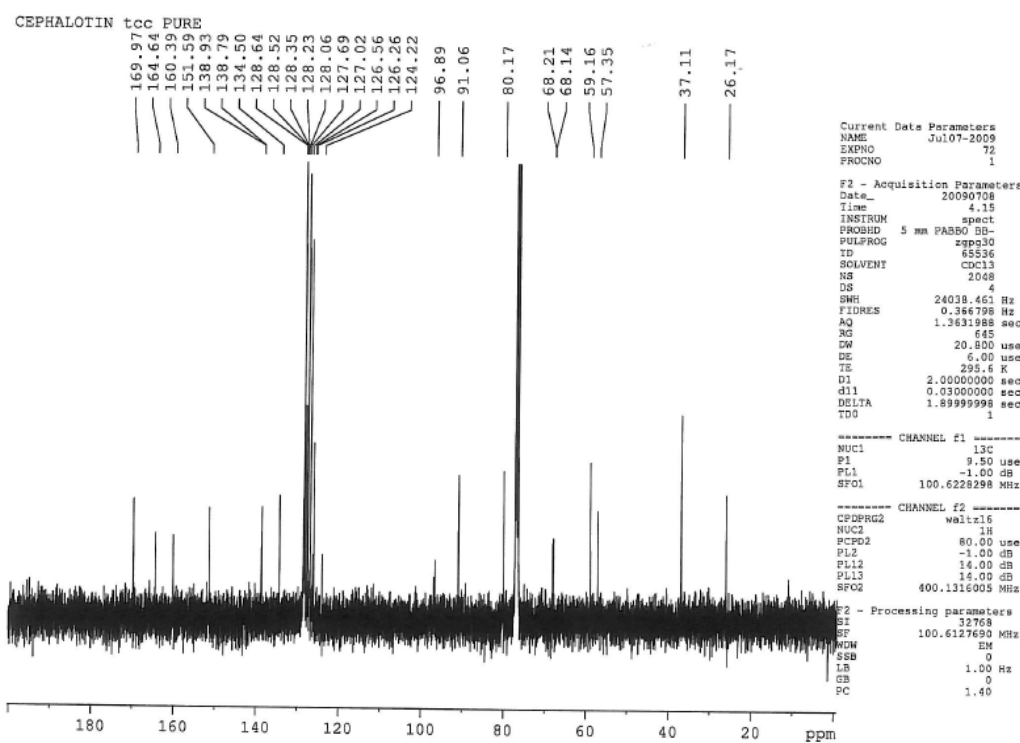

<sup>13</sup>C NMR (100.6 MHz, CDCl<sub>3</sub>)

**(6*R*, 7*R*)- 3-Prop-2-ynylcarbamoyloxymethyl -7-(2-thiophen-2-yl-acetyl-amino) 3-cephem-4-carboxylic acid benzhydryl ester (5c)**

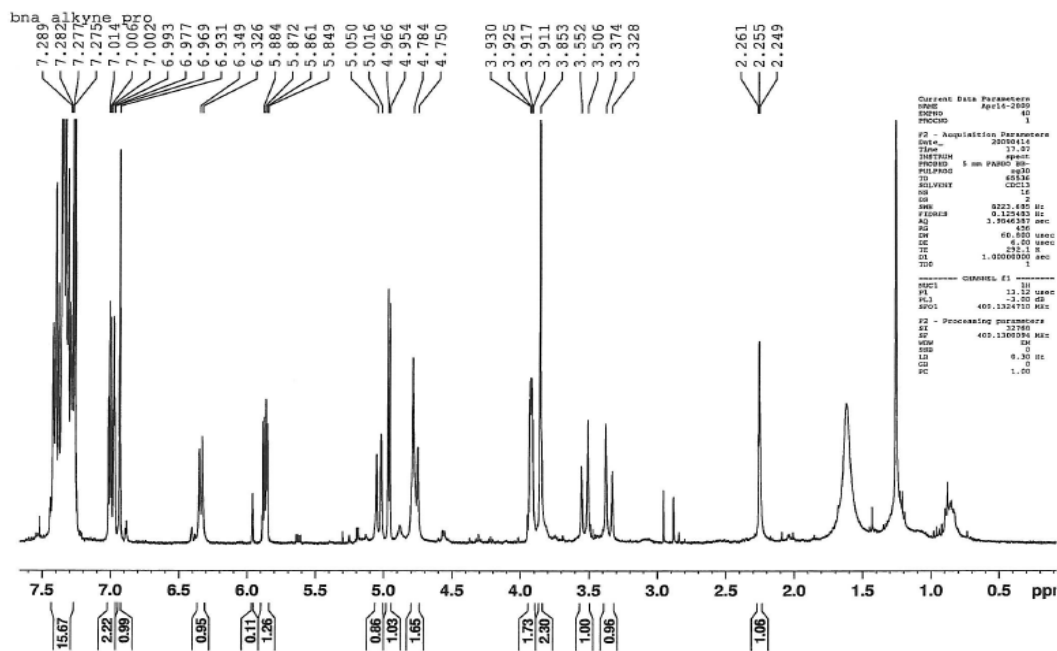

<sup>1</sup>H NMR (400 MHz, CDCl<sub>3</sub>)

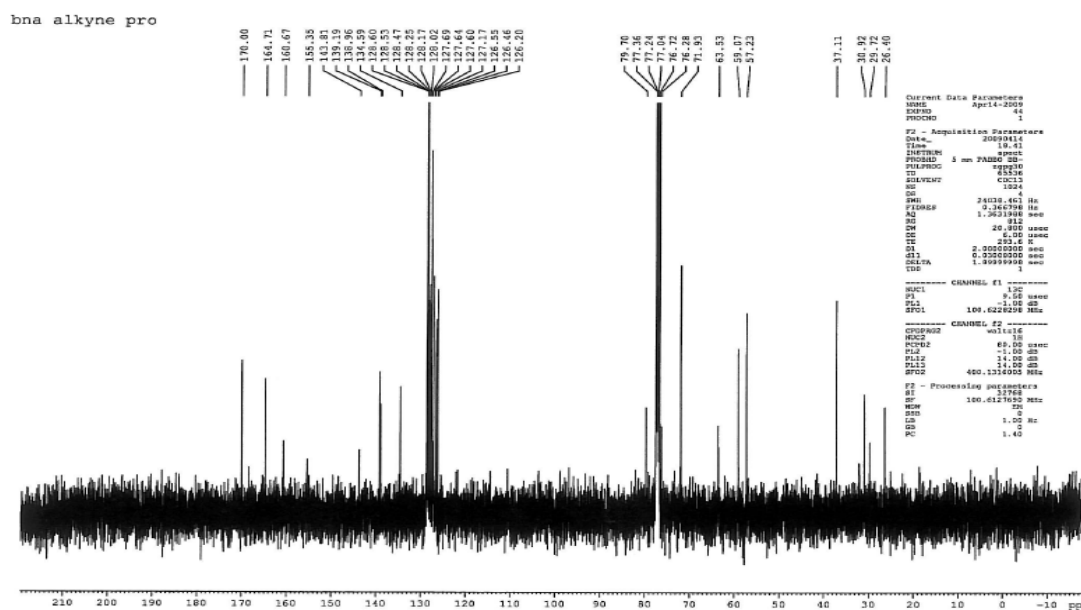

<sup>13</sup>C NMR (100.6 MHz, CDCl<sub>3</sub>)

**(6R, 7R)- 3-Prop-2-ynylcarbamoyloxymethyl -7-(2-thiophen-2-yl-acetylamino) 3-cephem-4-carboxylic acid (6)**

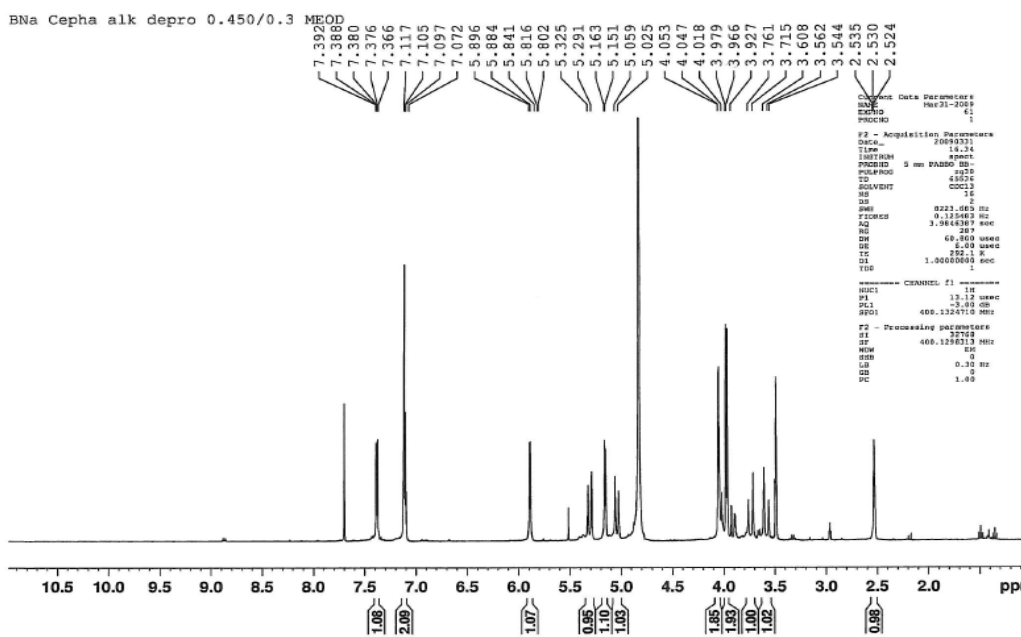

<sup>1</sup>H NMR (400 MHz, CDCl<sub>3</sub>/MeOD: 0.450/0.3)

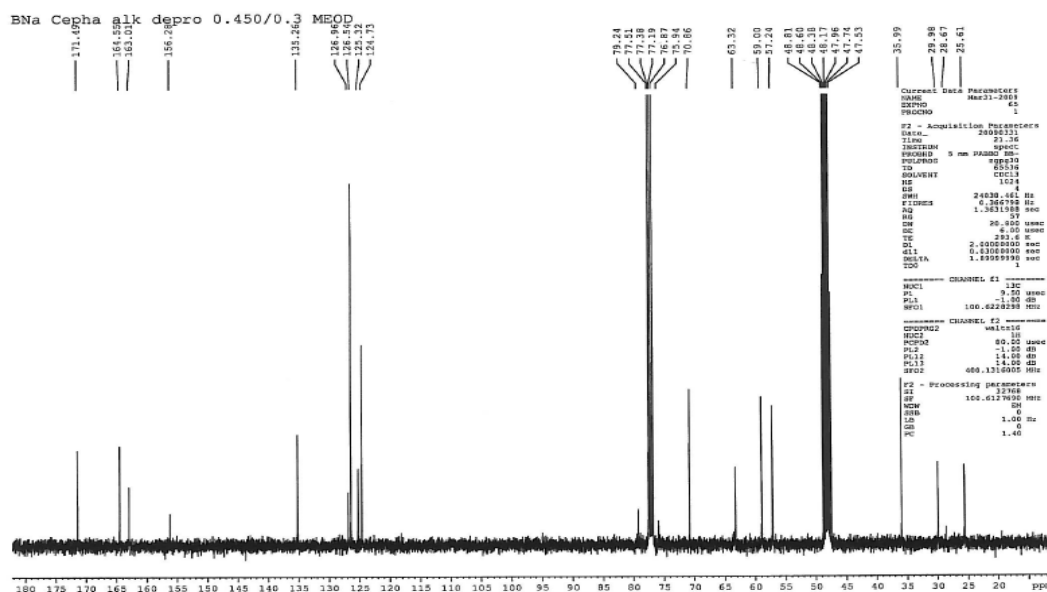

<sup>13</sup>C NMR (100.6 MHz, CDCl<sub>3</sub>)

### (6R, 7R)-3-Acetoxymethyl-7-prop-2-ynyloxycarbonylamino 3-cephem-4-carboxylic acid

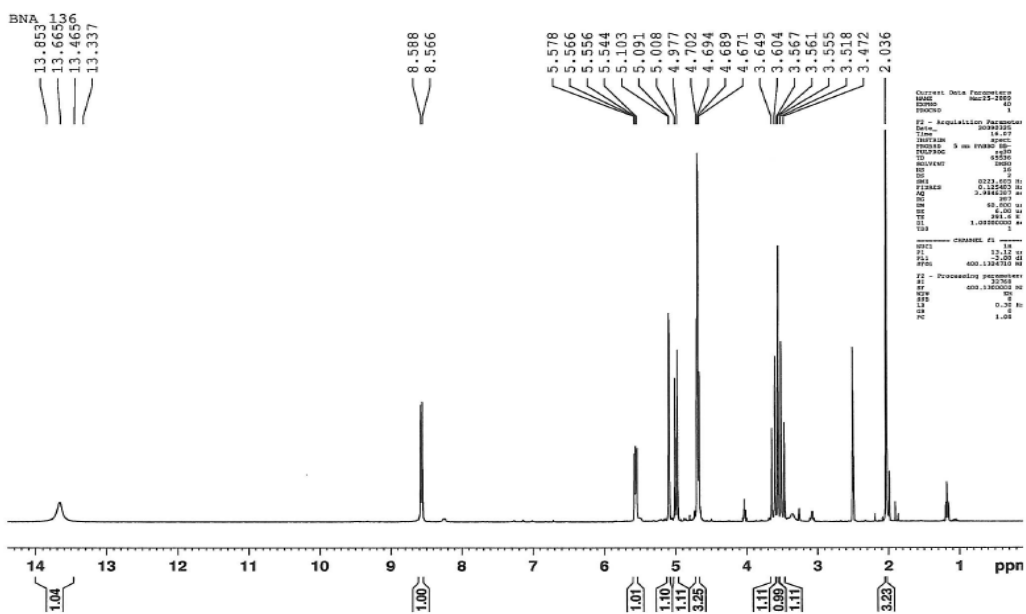

### <sup>1</sup>H NMR (400 MHz, DMSO)

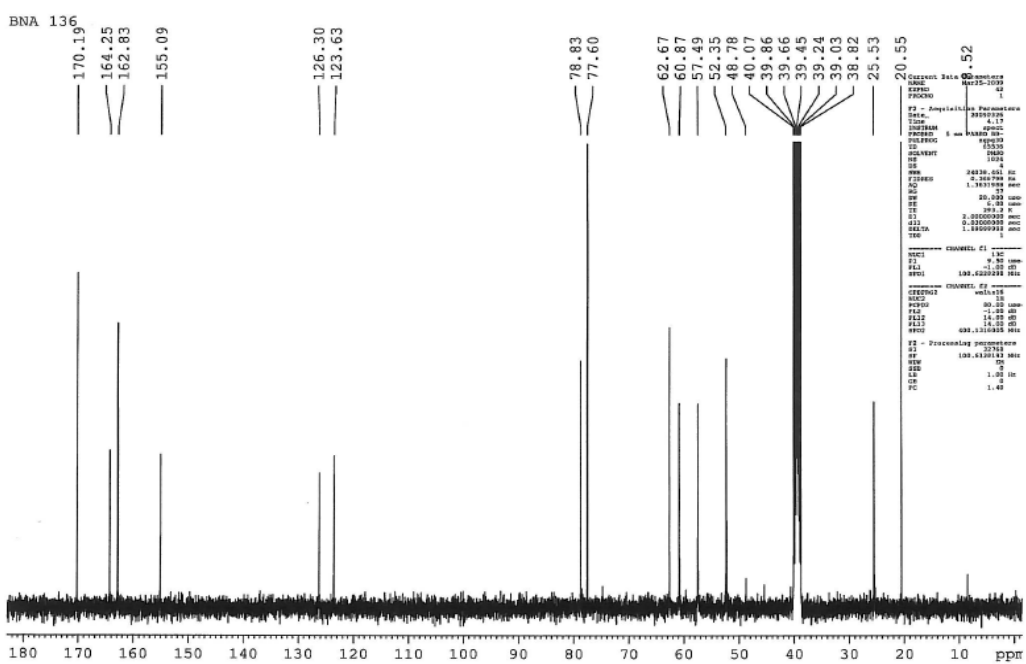

### <sup>13</sup>C NMR (100.6 MHz, CDCl<sub>3</sub>)

### N<sub>3</sub>-Arg(Pbf)-OH

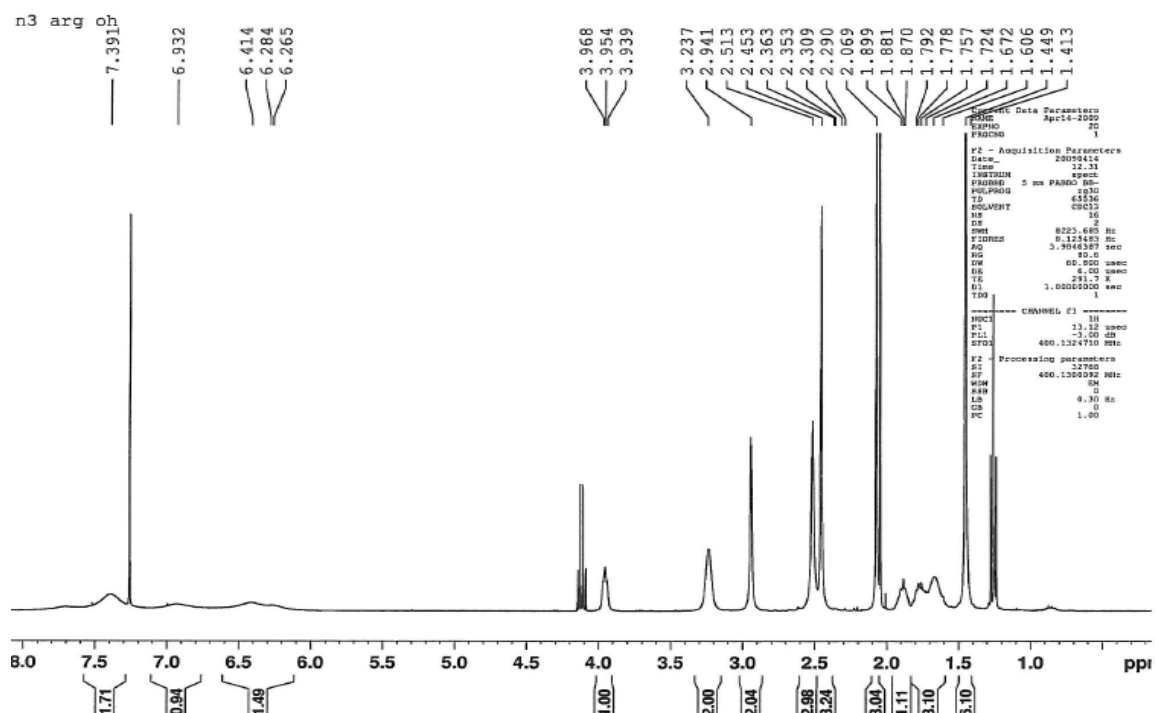

### <sup>1</sup>H NMR (400 MHz, CDCl<sub>3</sub>)

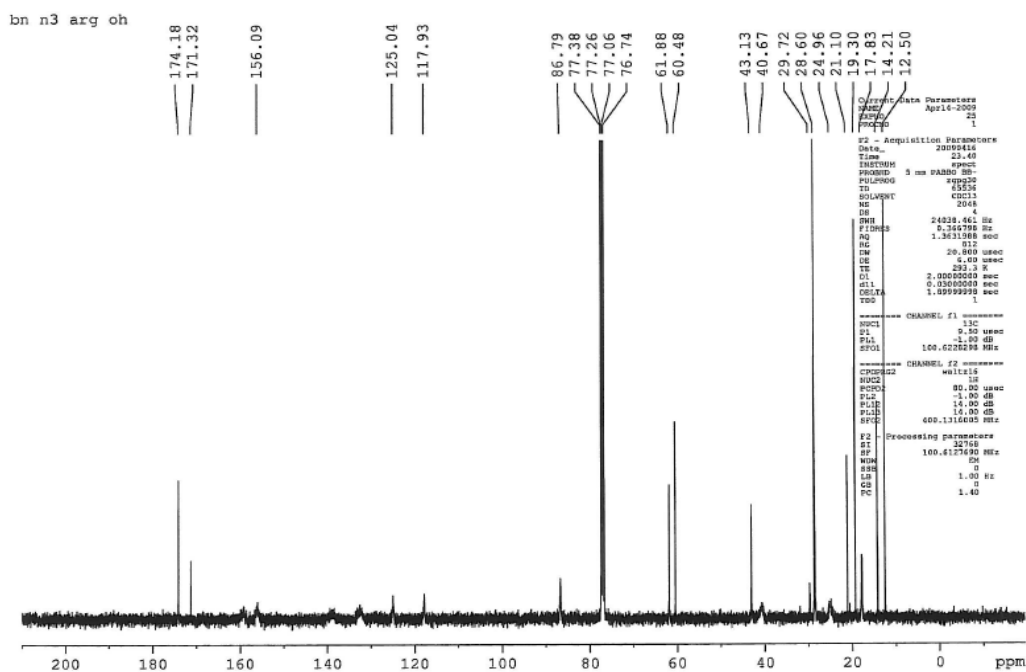

### <sup>13</sup>C NMR (100.6 MHz, CDCl<sub>3</sub>)

### N<sub>3</sub>-Arg(Mtr)-OH

bnr N3 arg MTR

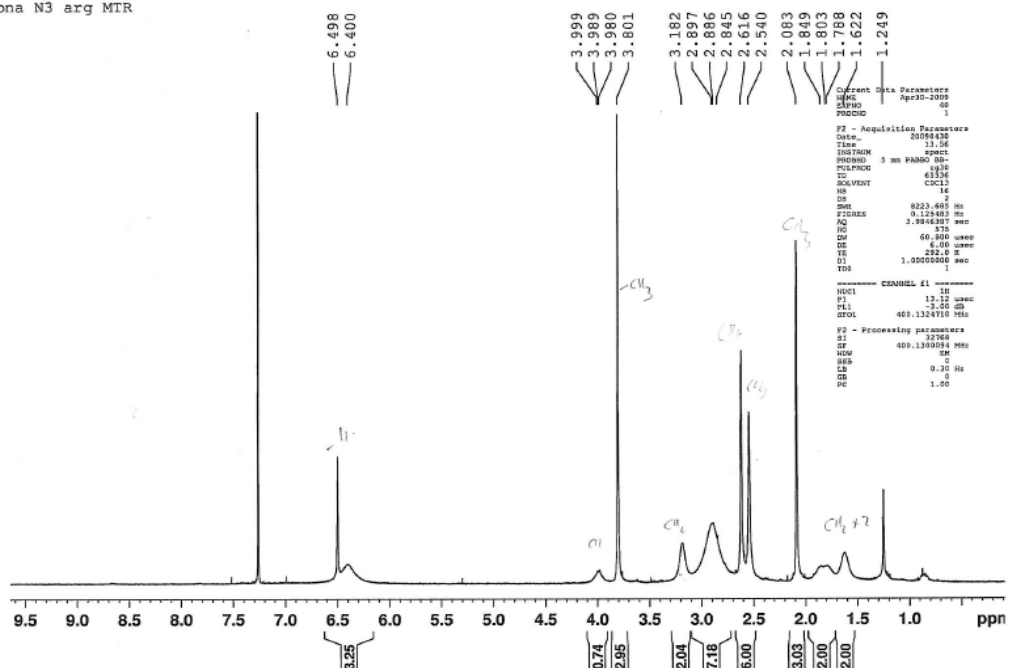

### <sup>1</sup>H NMR (400 MHz, D<sub>2</sub>O)

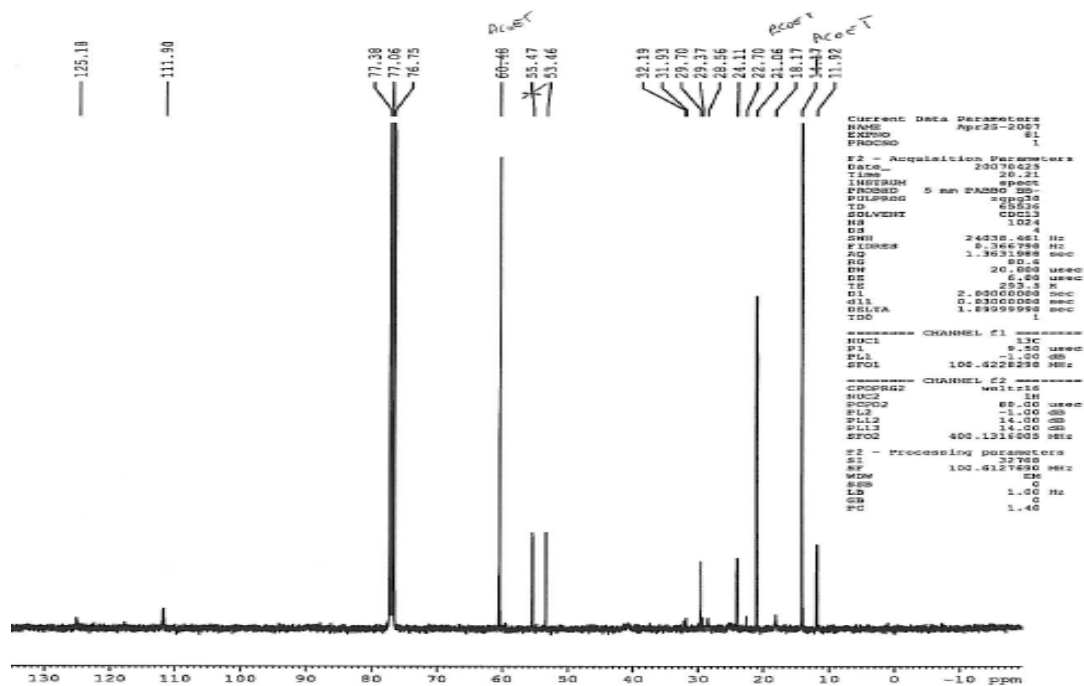

### <sup>13</sup>C NMR (100.6 MHz, CDCl<sub>3</sub>)



**N<sub>3</sub>-arg-leu-trp-val-leu-trp-arg-arg-NH<sub>2</sub> (azido- D-Bac8c(Leu<sup>2,5</sup>)-NH<sub>2</sub>), 7)**

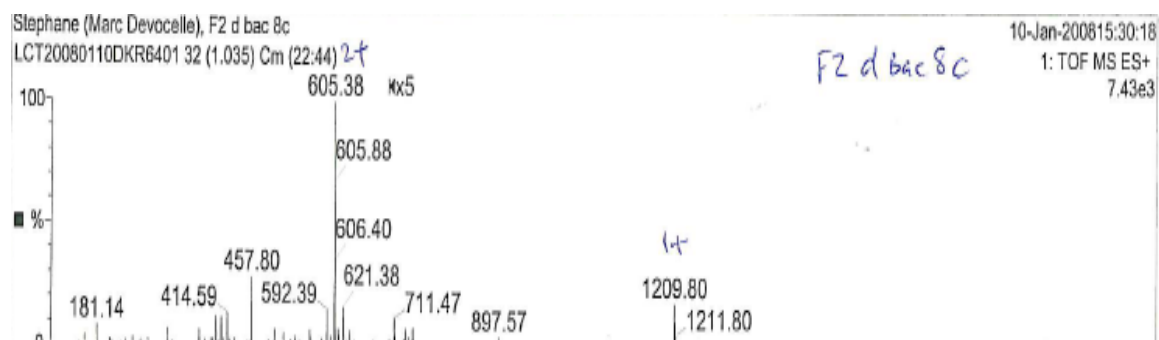

EI-MS

The signal at  $m/z = 1209.80$  corresponds to the molecular ion, *i.e.*  $[M + H]^+$ ; the signal at  $m/z = 605.38$  corresponds to a doubly charged ion, *i.e.*  $[M + 2H]^{2+}$ .

### N-Fmoc-propargylamine

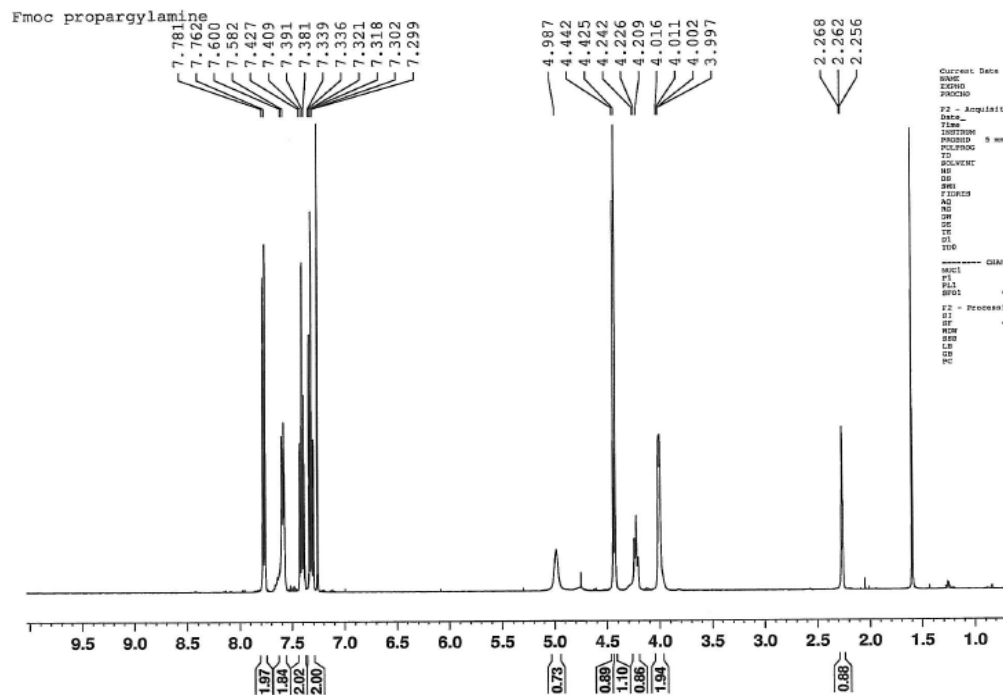

### <sup>1</sup>H NMR (400 MHz, CDCl<sub>3</sub>)

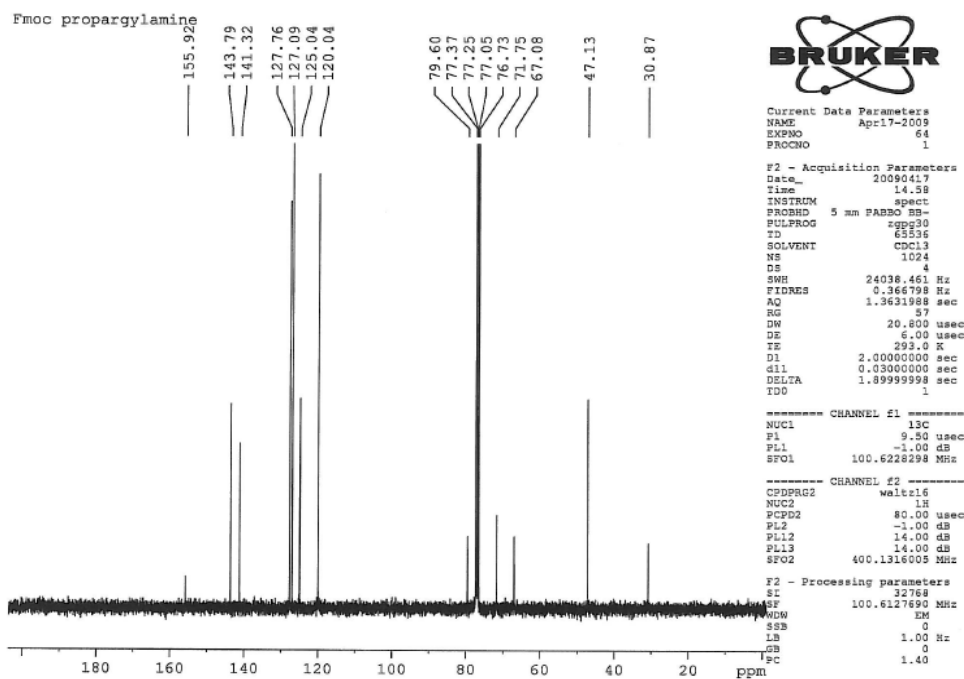

### <sup>13</sup>C NMR (100.6 MHz, CDCl<sub>3</sub>)

## D-Arg<sup>1</sup>-triazole-ε2- D-Bac8c(Leu<sup>2,5</sup>) (9)

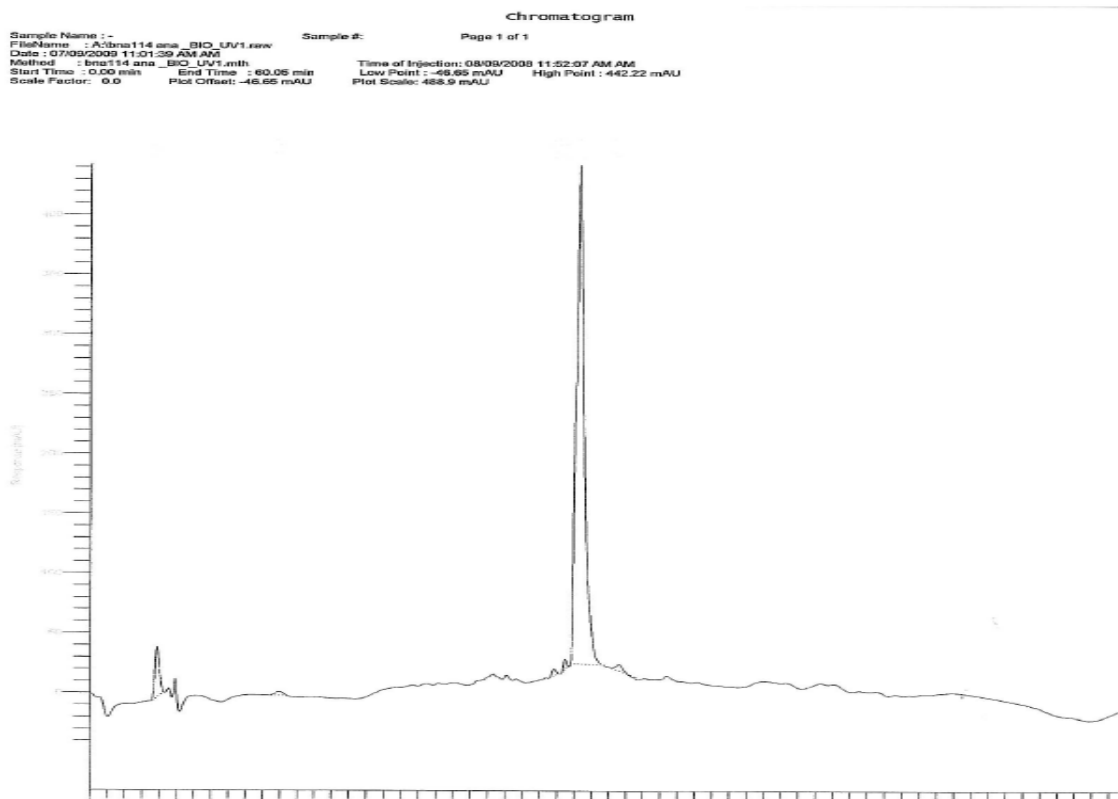

## RP-HPLC

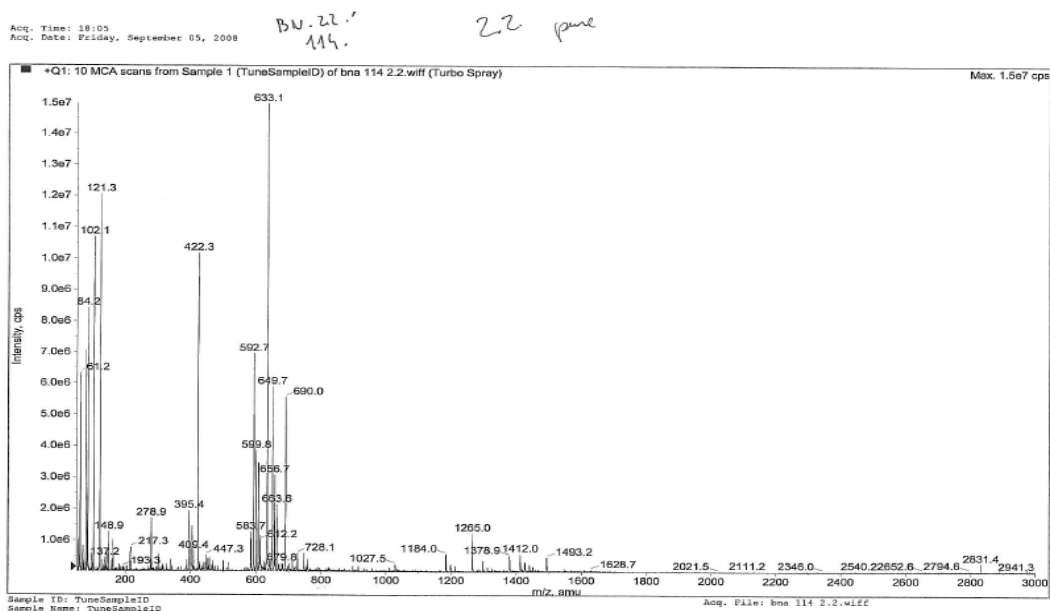

## EI-MS

The signal at  $m/z = 1265.0$  corresponds to the molecular ion, *i.e.*  $[M + H]^+$ ; the signal at  $m/z = 633.1$  corresponds to a doubly charged ion, *i.e.*  $[M + 2 H]^{2+}$ ; the signal at  $m/z = 422.3$  corresponds to a triply charged ion, *i.e.*  $[M + 3 H]^{3+}$ .

## Cephalothin-D-Bac8c(Leu<sup>2,5</sup>) (8)

### Chromatogram : bna22 prodrug pure1\_channel1

System : System\_1  
Method : general ana method2  
User : JVA

Acquired : 19/02/2009 10:40:08  
Processed : 29/06/2009 14:53:19  
Printed : 29/06/2009 14:53:45

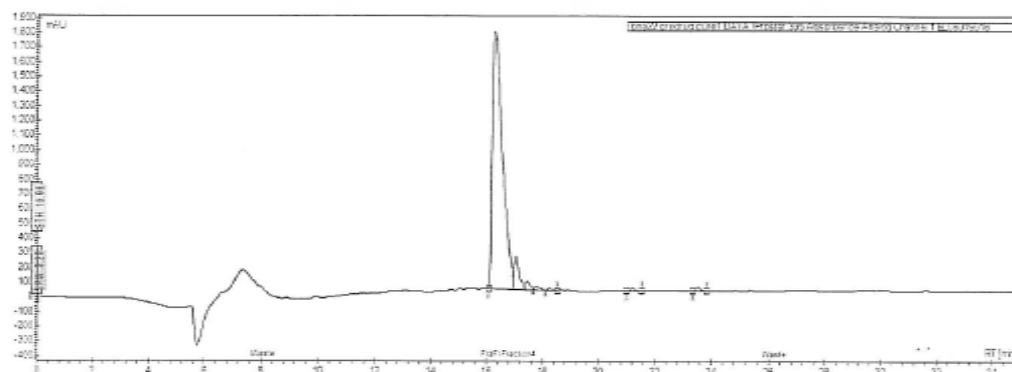

#### Peak results :

| Index | Name    | Time [Min] | Quantity [% Area] | Height [mAU] | Area [mAU.Min] | Area % [%] |
|-------|---------|------------|-------------------|--------------|----------------|------------|
| 1     | UNKNOWN | 16.27      | 91.08             | 1750.3       | 748.5          | 91.026     |
| 2     | UNKNOWN | 17.05      | 5.74              | 221.0        | 47.2           | 5.745      |
| 3     | UNKNOWN | 17.47      | 1.37              | 54.9         | 11.2           | 1.367      |
| 4     | UNKNOWN | 17.77      | 0.64              | 21.8         | 5.3            | 0.640      |
| 5     | UNKNOWN | 18.27      | 0.25              | 13.3         | 2.0            | 0.247      |
| 6     | UNKNOWN | 21.20      | 0.38              | 18.8         | 3.1            | 0.378      |
| 7     | UNKNOWN | 23.52      | 0.55              | 27.7         | 4.5            | 0.547      |
| Total |         |            | 100.00            | 2107.8       | 821.8          | 100.000    |

RP-HPLC

## Control 10

### Chromatogram : bn137 pure26\_channel1

System : System\_1  
 Method : ama 0.2 70 mn  
 User : Céline

Acquired : 30/09/2008 14:27:53  
 Processed : 18/04/2009 15:29:51  
 Printed : 29/06/2009 14:48:30

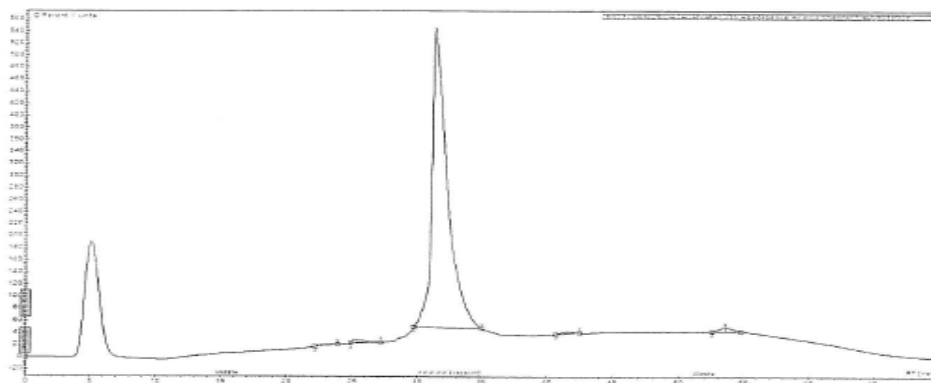

#### Peak results :

bn137 pure26.DAT (Proster 335 Absorbance Analog Channel 1 EL06019018 )

| Index | Name    | Time [Min] | Quantity [% Area] | Height [mAU] | Area [mAU.Min] | Area %  |
|-------|---------|------------|-------------------|--------------|----------------|---------|
| 1     | UNKNOWN | 22.83      | 0.34              | 2.3          | 2.4            | 0.339   |
| 2     | UNKNOWN | 25.15      | 0.80              | 5.3          | 5.6            | 0.805   |
| 3     | UNKNOWN | 31.31      | 97.93             | 497.1        | 695.5          | 97.932  |
| 4     | UNKNOWN | 41.49      | 0.49              | 3.5          | 3.4            | 0.488   |
| 5     | UNKNOWN | 53.55      | 0.44              | 5.4          | 3.1            | 0.437   |
| Total |         |            | 100.00            | 513.6        | 700.0          | 100.000 |

## RP-HPLC

Acq. Time: 17:37  
 Acq. Date: Tuesday, September 30, 2008

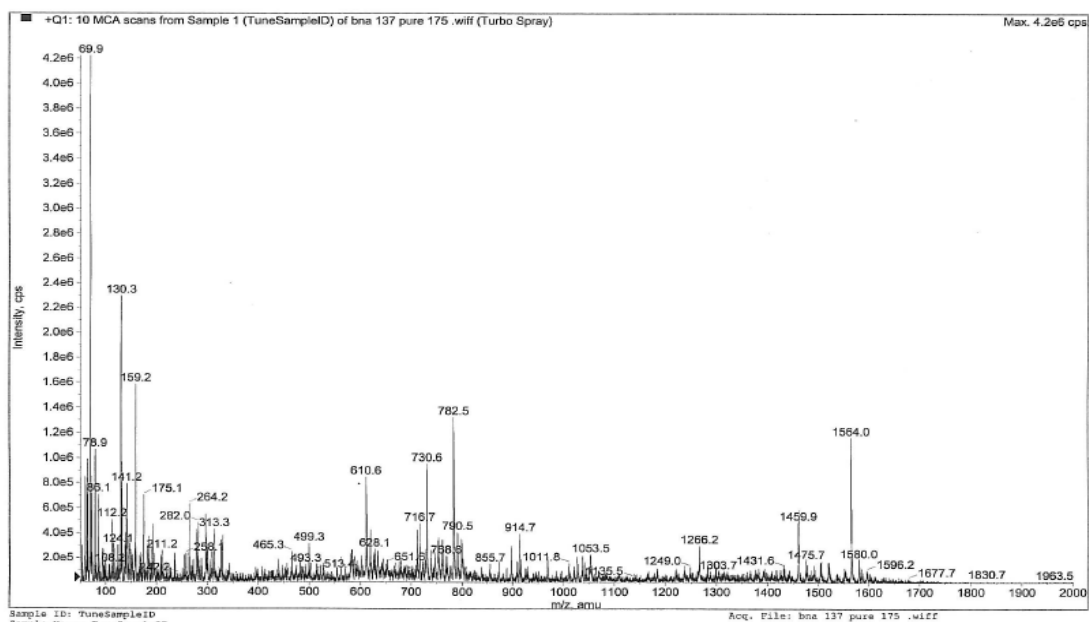

## EI-MS

The signal at  $m/z = 1564.0$  corresponds to the molecular ion, *i.e.*  $[M + H]^+$ ; the signal at  $m/z = 782.5$  corresponds to a doubly charged ion, *i.e.*  $[M + 2H]^{2+}$ .

(6*R*, 7*R*)- 7-(2-thiophen-2-yl-acetyl-amino)-3-formyl-3-cephem-4-carboxylic acid benzhydryl ester

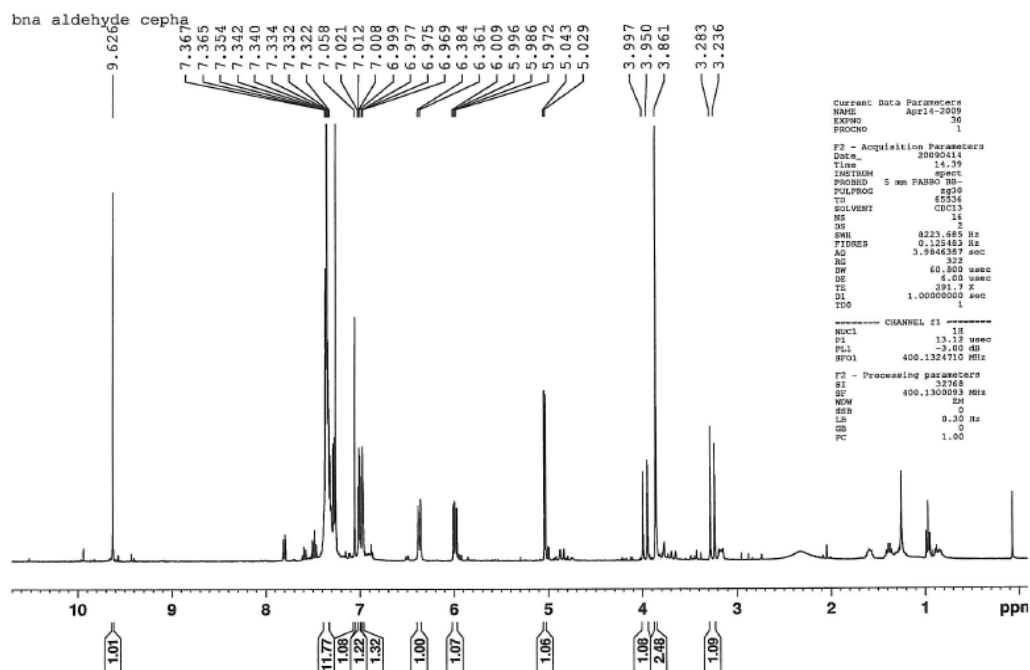

<sup>1</sup>H NMR (400 MHz, CDCl<sub>3</sub>)

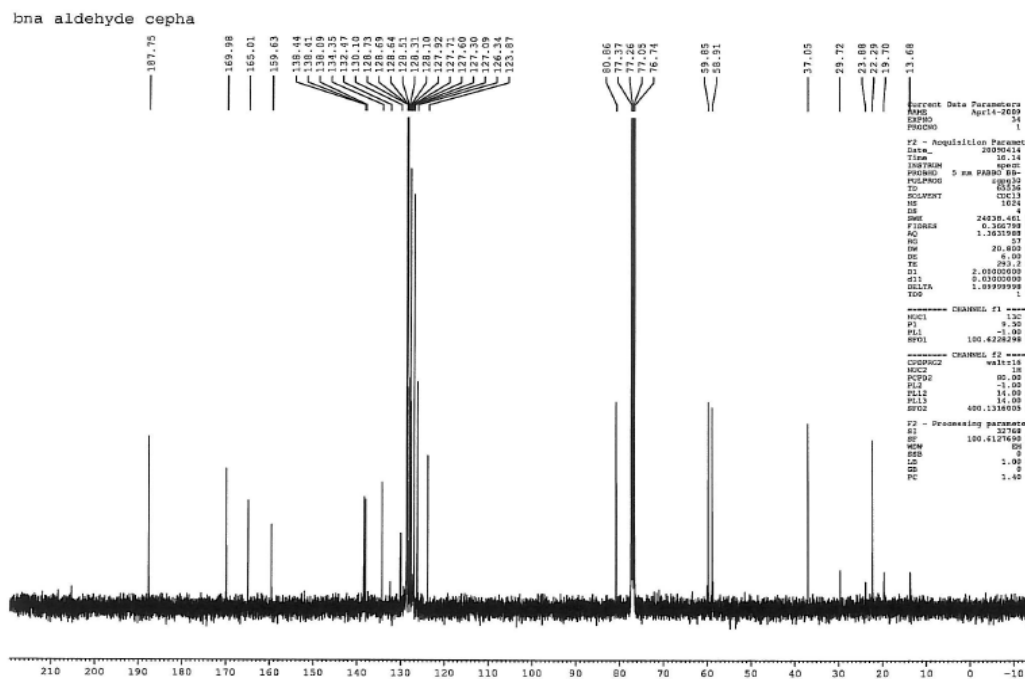

<sup>13</sup>C NMR (100.6 MHz, CDCl<sub>3</sub>)

**(6*R*, 7*R*)- 7-(2-thiophen-2-yl-acetylamino)-3-(prop-2-ynyloxyimino-methyl)-3-cephem-4-carboxylic acid benzhydryl ester**

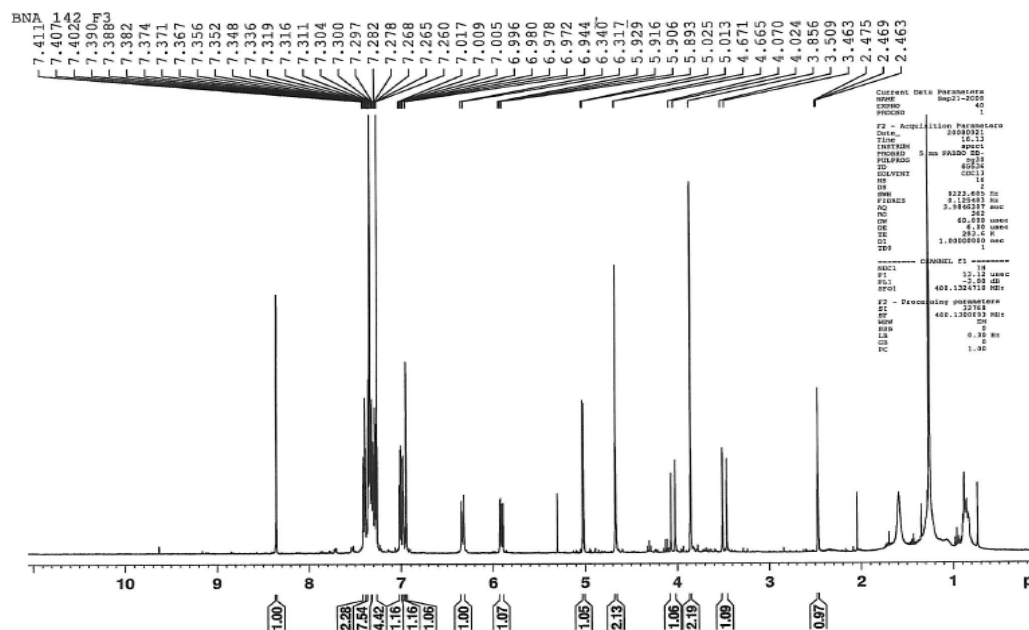

<sup>1</sup>H NMR (400 MHz, CDCl<sub>3</sub>)

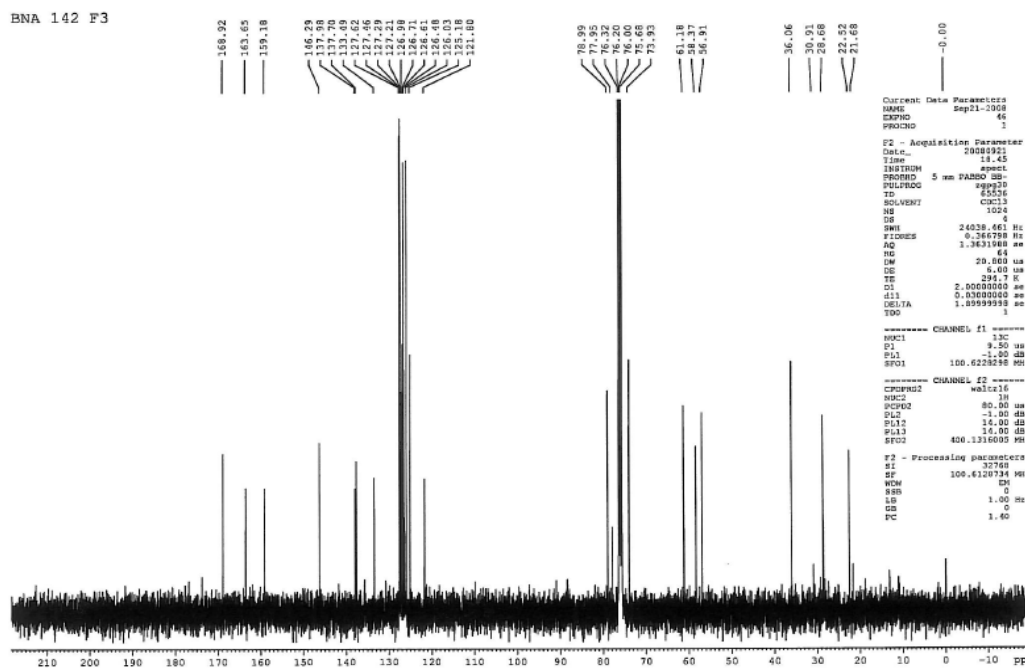

<sup>13</sup>C NMR (100.6 MHz, CDCl<sub>3</sub>)

## Control 11

### Chromatogram : bn145 depro pure6\_channel1

System : System\_1  
 Method : ana 0.2 70 mn  
 User : JVA

Acquired : 30/09/2008 16:07:58  
 Processed : 01/07/2009 18:12:35  
 Printed : 01/07/2009 18:13:01

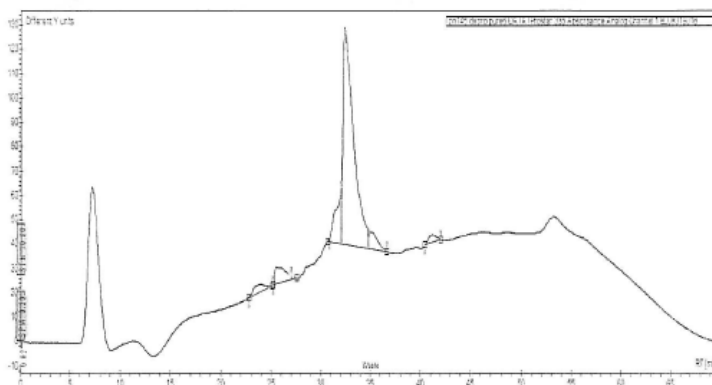

### Peak results :

| Index | Name    | Time (Min) | Quantity (% Area) | Height (mAU) | Area (mAU Min) | Area % [%] |
|-------|---------|------------|-------------------|--------------|----------------|------------|
| 1     | UNKNOWN | 23.64      | 2.81              | 3.4          | 4.2            | 2.811      |
| 2     | UNKNOWN | 25.53      | 5.46              | 6.9          | 8.1            | 5.461      |
| 3     | UNKNOWN | 32.02      | 9.56              | 22.0         | 14.1           | 9.566      |
| 4     | UNKNOWN | 32.80      | 75.23             | 89.1         | 111.3          | 75.232     |
| 5     | UNKNOWN | 34.77      | 5.01              | 7.6          | 7.4            | 5.007      |
| 6     | UNKNOWN | 41.15      | 1.91              | 3.1          | 2.8            | 1.913      |
| Total |         |            | 100.00            | 132.4        | 147.9          | 100.000    |

## RP-HPLC

Acq. Time: 15:53  
 Acq. Date: Tuesday, September 30, 2008

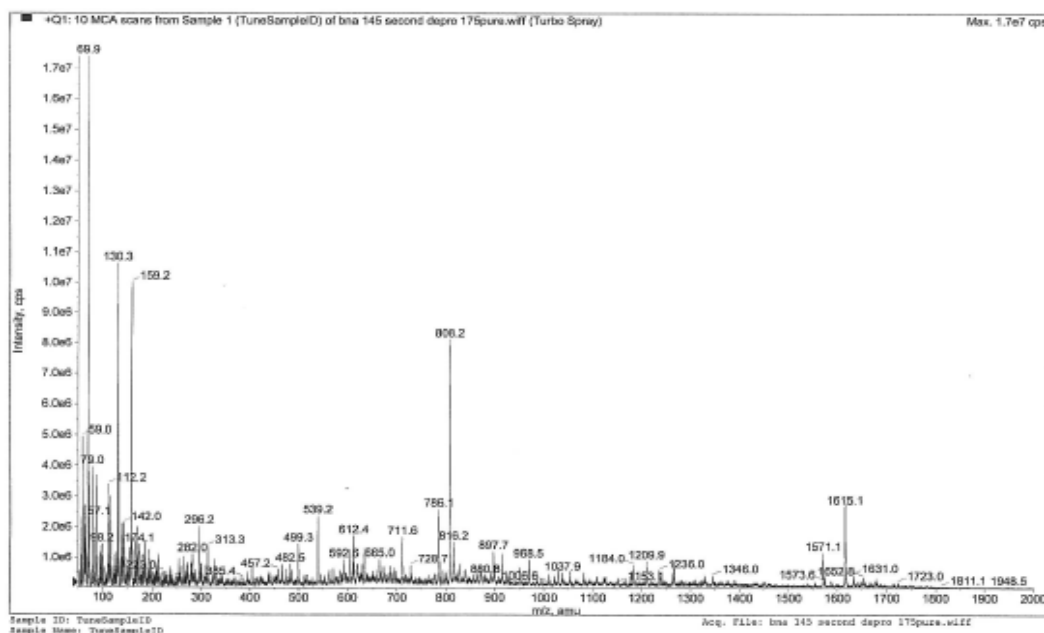

## EI-MS

The signal at  $m/z = 1615.1$  corresponds to the molecular ion, *i.e.*  $[M + H]^+$ ; the signal at  $m/z = 806.2$  corresponds to a doubly charged ion, *i.e.*  $[M + 2H]^{2+}$ .
